# Supplementary material
Source: publisher site journal article supplement (https://www.spandidos-publications.com/1456/downloadSupplementary)

Figure S1. SLMO2-ATP5E and LOC100132062 RNA expression is significantly higher in human colorectal cancer tissues compared with corresponding adjacent tissues. Data were analyzed using paired t-test. \*\*\*P<0.001.

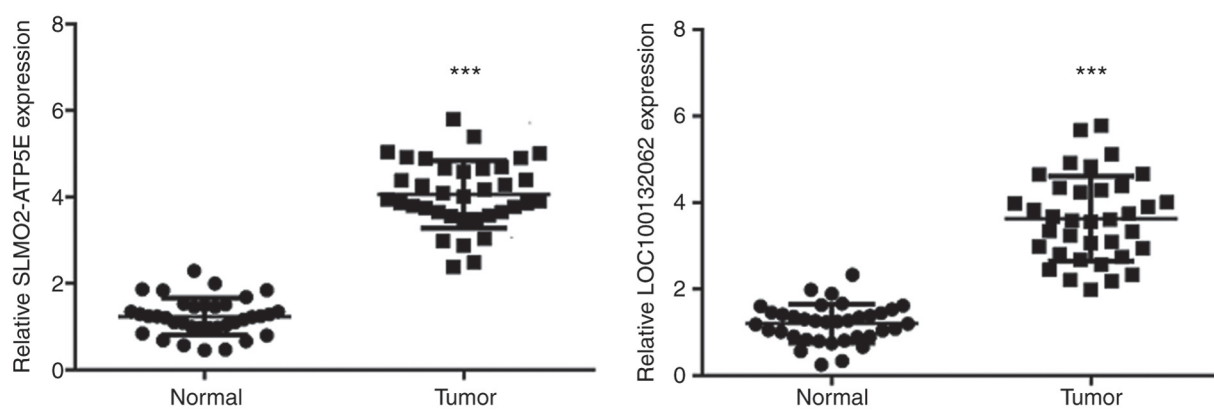

Figure S2. SLMO2-ATP5E and LOC100132062 expression is significantly lower in both SW480 and SW620 colorectal cancer cells after the transfection of the corresponding siRNAs. (A and B) Reverse transcription-quantitative PCR assays showed the decreased expression levels of (A) SLMO2-ATP5E and (B) LOC100132062 after transfection with the corresponding siRNAs in SW480 cells and SW620 cells. Data were analyzed using unpaired t-tests. \* $P < 0.05$ , \*\* $P < 0.01$ . siRNAs/si, small interfering RNAs.

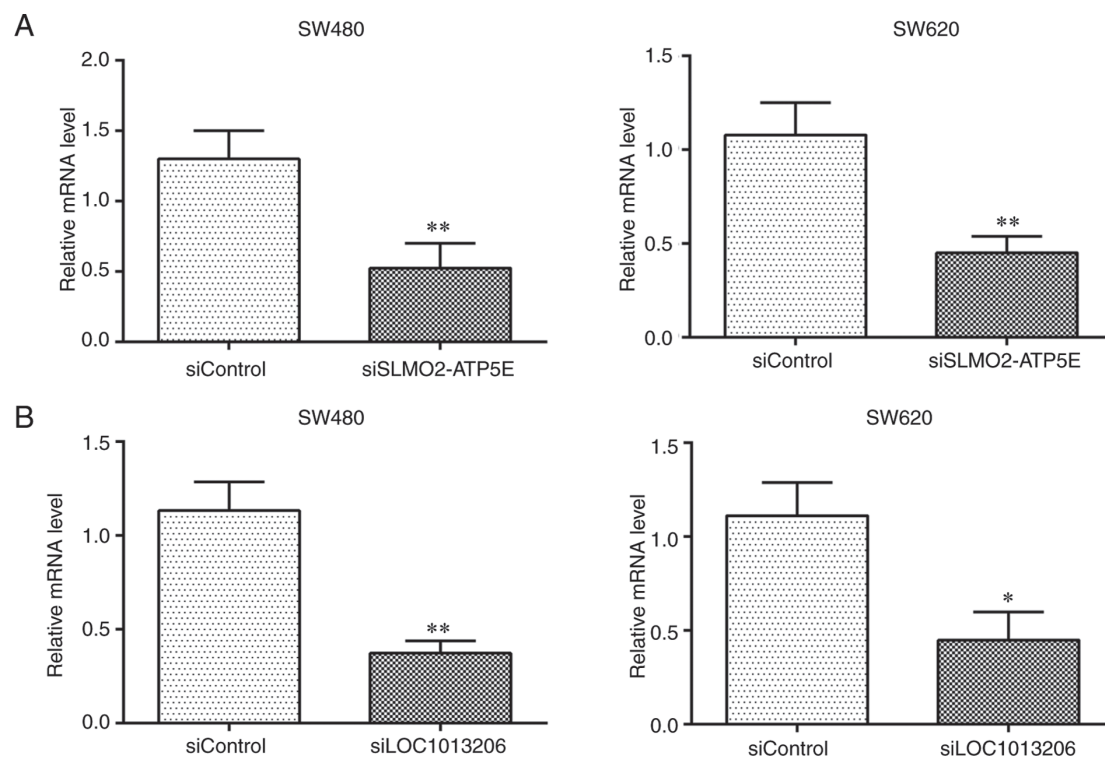

Figure S3. SLMO2-ATP5E and LOC100132062 have no significant effects on colorectal cancer cell proliferation. Colony-formation assays showed the effects of (A) SLMO2-ATP5E and (B) LOC100132062 on cell proliferation after transfection with the corresponding siRNAs in SW480 cells and SW620 cells. Data were analyzed using unpaired t-tests. Ns, no significance; siRNAs/si, small interfering RNAs.

A

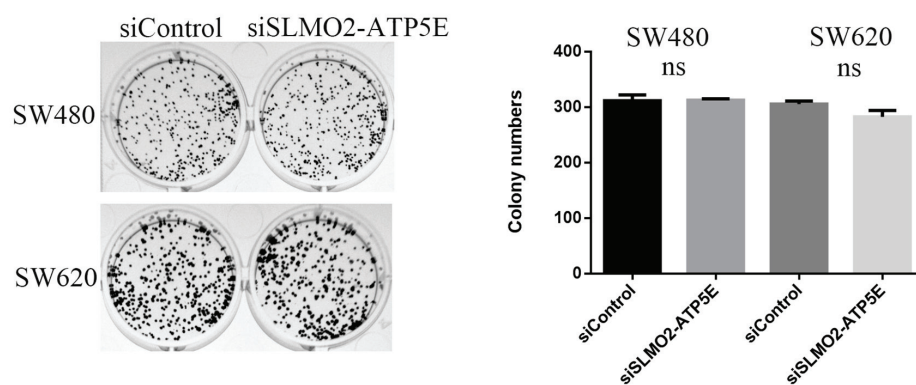

B

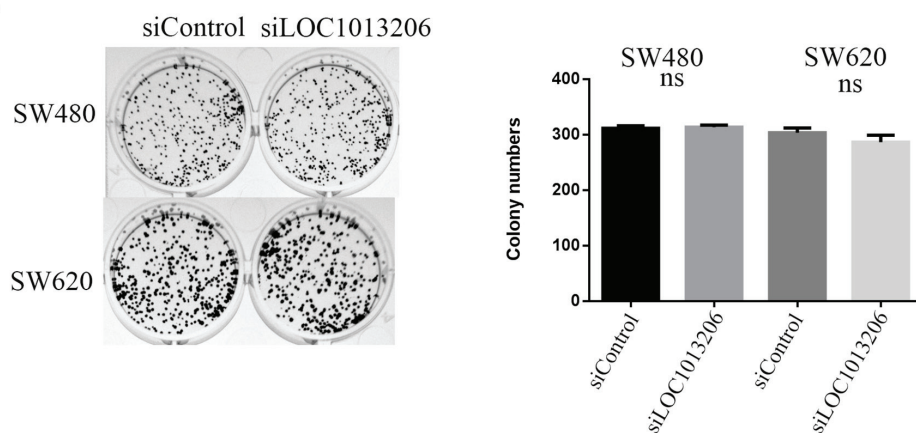

Supplement: Supplementary file 1 [file downloadSupplementary]
